# Supplementary material for: Goji Berry in the Diet of the Rabbit Buck: Effects on Semen Quality, Oxidative Status and Histological Features of the Reproductive Tract
Source: MDPI journal article supplement (doi:10.3390/antiox12111959), 2023-11-02

## Supplementary material

**Table S1:** Crosstabulation of the histological scores by group according to the tissue and parameter.

| Tissue               | Parameter           | Score | Group   |            |       |            | P value* | Eta                   |
|----------------------|---------------------|-------|---------|------------|-------|------------|----------|-----------------------|
|                      |                     |       | Control |            | Goji  |            |          |                       |
|                      |                     |       | Count   | Column N % | Count | Column N % |          |                       |
| Epididymis           | Phlogosis           | 0     | 9       | 100.0%     | 8     | 100.0%     | -        | -                     |
|                      | Degeneration        | 0     | 8       | 88.9%      | 6     | 75.0%      | 0.718    | 0.241                 |
|                      |                     | 1     | 1       | 11.1%      | 1     | 12.5%      |          |                       |
|                      |                     | 2     | 0       | 0.0%       | 1     | 12.5%      |          |                       |
|                      | Functional activity | 0     | 3       | 33.3%      | 0     | 0.0%       | 0.194    | 0.543<br>(eta²=0.737) |
|                      |                     | 1     | 1       | 11.1%      | 0     | 0.0%       |          |                       |
|                      |                     | 2     | 3       | 33.3%      | 3     | 37.5%      |          |                       |
|                      |                     | 3     | 2       | 22.2%      | 5     | 62.5%      |          |                       |
|                      | Hyperplasia         | 0     | 7       | 77.8%      | 5     | 62.5%      | 0.462    | 0.291                 |
|                      |                     | 1     | 2       | 22.2%      | 1     | 12.5%      |          |                       |
|                      |                     | 2     | 0       | 0.0%       | 2     | 25.0%      |          |                       |
|                      | Necrosis            | 0     | 9       | 100.0%     | 8     | 100.0%     | -        | -                     |
| Urethral bulb glands | Phlogosis           | 0     | 8       | 88.9%      | 7     | 87.5%      | 1.000    | 0.095                 |
|                      |                     | 1     | 0       | 0.0%       | 1     | 12.5%      |          |                       |
|                      |                     | 2     | 1       | 11.1%      | 0     | 0.0%       |          |                       |
|                      | Degeneration        | 0     | 6       | 66.7%      | 7     | 87.5%      | 1.000    | 0.280                 |
|                      |                     | 1     | 2       | 22.2%      | 1     | 12.5%      |          |                       |
|                      |                     | 2     | 1       | 11.1%      | 0     | 0.0%       |          |                       |
|                      | Functional activity | 0     | 1       | 11.1%      | 2     | 25.0%      | 0.741    | 0.023                 |
|                      |                     | 1     | 5       | 55.6%      | 2     | 25.0%      |          |                       |
|                      |                     | 2     | 2       | 22.2%      | 3     | 37.5%      |          |                       |
|                      |                     | 3     | 1       | 11.1%      | 1     | 12.5%      |          |                       |
|                      | Hyperplasia         | 0     | 3       | 33.3%      | 4     | 50.0%      | 0.741    | 0.000                 |
|                      |                     | 1     | 3       | 33.3%      | 1     | 12.5%      |          |                       |
|                      |                     | 2     | 3       | 33.3%      | 2     | 25.0%      |          |                       |
|                      |                     | 3     | 0       | 0.0%       | 1     | 12.5%      |          |                       |
|                      | Necrosis            | 0     | 9       | 100.0%     | 8     | 100.0%     | -        | -                     |

|                  |                     |   |                |        |                |        |       |                                           |
|------------------|---------------------|---|----------------|--------|----------------|--------|-------|-------------------------------------------|
| Prostate         | Phlogosis           | 0 | 9              | 100.0% | 8              | 100.0% | -     | -                                         |
|                  | Degeneration        | 0 | 8              | 88.9%  | 6              | 75.0%  | 0.576 | 0.182                                     |
|                  |                     | 1 | 1              | 11.1%  | 2              | 25.0%  |       |                                           |
|                  | Functional activity | 0 | 2              | 22.2%  | 0              | 0.0%   | 0.793 | 0.238                                     |
|                  |                     | 1 | 4              | 44.4%  | 4              | 50.0%  |       |                                           |
|                  |                     | 2 | 2              | 22.2%  | 3              | 37.5%  |       |                                           |
|                  |                     | 3 | 1              | 11.1%  | 1              | 12.5%  |       |                                           |
|                  | Hyperplasia         | 0 | 3              | 33.3%  | 2              | 25.0%  | 1.000 | 0.181                                     |
|                  |                     | 1 | 3              | 33.3%  | 2              | 25.0%  |       |                                           |
|                  |                     | 2 | 2              | 22.2%  | 2              | 25.0%  |       |                                           |
|                  |                     | 3 | 1              | 11.1%  | 2              | 25.0%  |       |                                           |
|                  | Necrosis            | 0 | 9              | 100.0% | 8              | 100.0% | -     | -                                         |
| Testis           | Phlogosis           | 0 | 9              | 100.0% | 8              | 100.0% | -     | -                                         |
|                  | Degeneration        | 0 | 7              | 77.8%  | 7              | 87.5%  | 1.000 | 0.191                                     |
|                  |                     | 1 | 1              | 11.1%  | 1              | 12.5%  |       |                                           |
|                  |                     | 2 | 1              | 11.1%  | 0              | 0.0%   |       |                                           |
|                  | Functional activity | 0 | 2 <sub>a</sub> | 22.2%  | 0 <sub>a</sub> | 0.0%   | 0.046 | <b>0.611</b><br>(eta <sup>2</sup> =0.782) |
|                  |                     | 1 | 4 <sub>a</sub> | 44.4%  | 0 <sub>b</sub> | 0.0%   |       |                                           |
|                  |                     | 2 | 2 <sub>a</sub> | 22.2%  | 5 <sub>a</sub> | 62.5%  |       |                                           |
|                  |                     | 3 | 1 <sub>a</sub> | 11.1%  | 3 <sub>a</sub> | 37.5%  |       |                                           |
|                  | Hyperplasia         | 0 | 7              | 77.8%  | 3              | 37.5%  | 0.302 | <b>0.457</b>                              |
|                  |                     | 1 | 1              | 11.1%  | 1              | 12.5%  |       |                                           |
|                  |                     | 2 | 1              | 11.1%  | 3              | 37.5%  |       |                                           |
|                  |                     | 3 | 0              | 0.0%   | 1              | 12.5%  |       |                                           |
|                  | Necrosis            | 0 | 9              | 100.0% | 8              | 100.0% | -     | -                                         |
| Seminal vesicles | Phlogosis           | 0 | 9              | 100.0% | 7              | 87.5%  | 0.471 | 0.265                                     |
|                  |                     | 2 | 0              | 0.0%   | 1              | 12.5%  |       |                                           |
|                  | Degeneration        | 0 | 8              | 88.9%  | 7              | 87.5%  | 1.000 | 0.022                                     |
|                  |                     | 1 | 1              | 11.1%  | 1              | 12.5%  |       |                                           |
|                  | Functional activity | 0 | 4              | 44.4%  | 2              | 25.0%  | 0.445 | 0.116                                     |
|                  |                     | 1 | 2              | 22.2%  | 4              | 50.0%  |       |                                           |
|                  |                     | 2 | 2              | 22.2%  | 0              | 0.0%   |       |                                           |
|                  |                     | 3 | 1              | 11.1%  | 2              | 25.0%  |       |                                           |
|                  | Hyperplasia         | 0 | 5              | 55.6%  | 3              | 37.5%  | 0.332 | 0.388                                     |
|                  |                     | 1 | 4              | 44.4%  | 2              | 25.0%  |       |                                           |
|                  |                     | 2 | 0              | 0.0%   | 2              | 25.0%  |       |                                           |
|                  |                     | 3 | 0              | 0.0%   | 1              | 12.5%  |       |                                           |
|                  | Necrosis            | 0 | 9              | 100.0% | 8              | 100.0% | -     | -                                         |

Goji berry dietary supplementation and semen traits

\* p value from Fisher’s exact

- No computed as variable is constant

Values followed by the same subscript letter in each row do not differ ( $p \leq 0.05$ ; z-test).

Eta values indicating medium or large association are in bold.

**Table S2:** Spearman's rho coefficient for the correlations between histological scores evaluated in urethral bulb glands, prostate and seminal vesicles, and seminal parameters, total antioxidant capacity, antioxidant enzymes, and interleukin-1 $\beta$ .

| Tissue               | Parameter           | Volume        | Concentration | Motility      | Live cells    | Abnormal cells | Reaction time | TAC    | CAT           | SOD            | GPx            | IL1beta        |
|----------------------|---------------------|---------------|---------------|---------------|---------------|----------------|---------------|--------|---------------|----------------|----------------|----------------|
| Urethral bulb glands | Degeneration        | <b>0.583*</b> | -0.119        | -0.132        | 0.079         | 0              | 0.212         | 0.364  | 0.404         | 0.132          | 0.02           | -0.304         |
|                      | Functional activity | 0.384         | 0.47          | <b>0.589*</b> | <b>0.599*</b> | -0.385         | 0.068         | 0.09   | -0.096        | <b>-0.563*</b> | -0.013         | -0.132         |
|                      | Hyperplasia         | 0.296         | 0.058         | -0.08         | 0.057         | 0.032          | 0.236         | -0.049 | 0.07          | -0.056         | <b>-0.518*</b> | <b>-0.570*</b> |
| Prostate             | Degeneration        | -0.095        | 0.315         | 0.079         | 0.300         | -0.315         | -0.189        | 0.378  | <b>0.567*</b> | 0.157          | 0.441          | -0.031         |
|                      | Functional activity | 0.053         | 0.301         | 0.385         | 0.464         | <b>-0.504*</b> | -0.109        | 0.477  | <b>0.570*</b> | -0.100         | <b>0.531*</b>  | 0.19           |
|                      | Hyperplasia         | 0.127         | 0.285         | 0.152         | 0.267         | -0.227         | 0.242         | 0.372  | <b>0.571*</b> | 0.161          | 0.013          | -0.061         |
| Seminal vesicles     | Degeneration        | -0.112        | 0.112         | 0.056         | 0.037         | -0.373         | 0.335         | 0.298  | 0.335         | 0.037          | 0.149          | -0.075         |
|                      | Functional activity | 0.02          | 0.199         | 0.261         | 0.229         | -0.194         | -0.086        | 0.311  | 0.376         | 0.134          | 0.175          | 0.023          |
|                      | Hyperplasia         | -0.159        | 0.354         | 0.270         | 0.236         | <b>-0.529*</b> | -0.056        | 0.340  | 0.431         | 0.038          | 0.104          | -0.230         |

TAC: Total Antioxidant Capacity; CAT: Catalase; GPx: Glutathione Peroxidase; SOD: Superoxidase Dismutase; IL-1 $\beta$ : Interleukin-1  $\beta$ . Values in bold denote statistical significance of the correlation (2-tailed): \* at the 0.05 level.

**Figure S1:** Evaluation of the color of the semen samples. The values are the percentages of the samples for each time point.

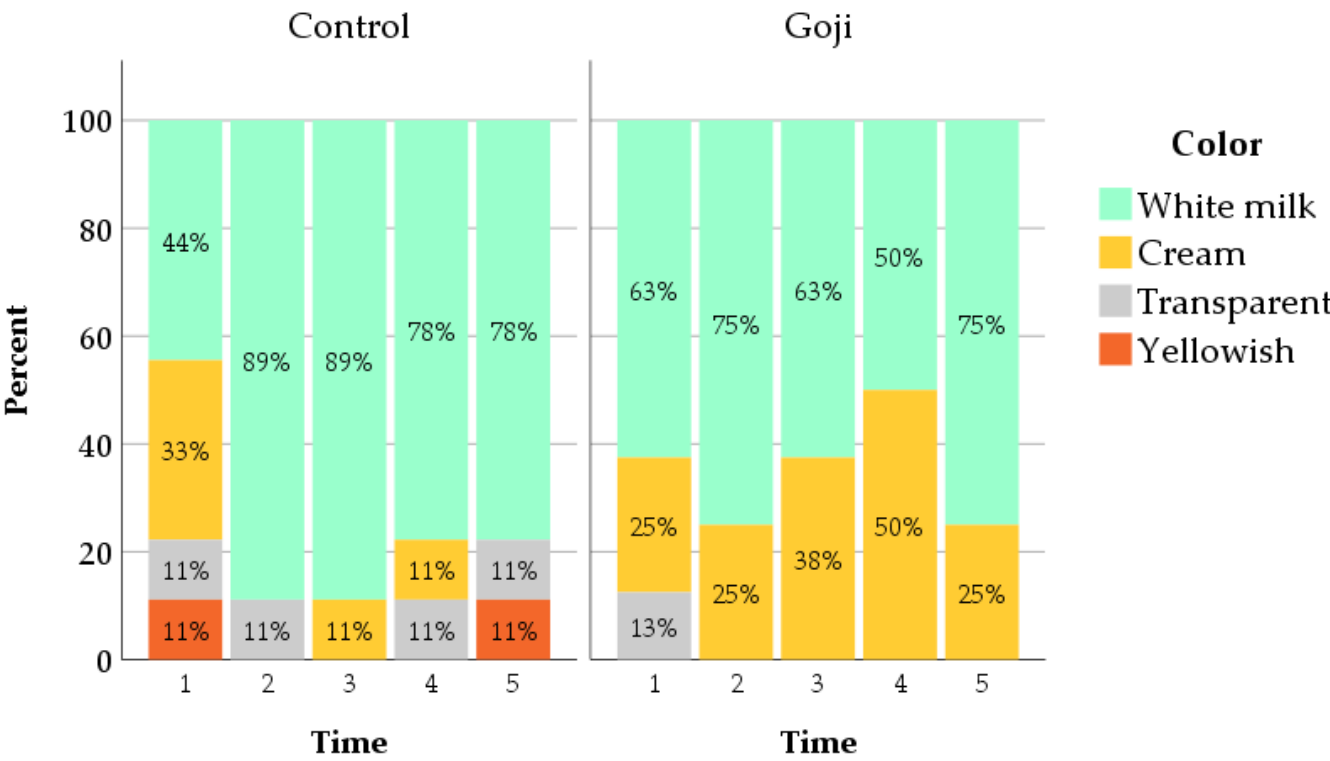

Supplement: s1 [file s1]
